1 **ORIGINAL ARTICLE**

2 **Estimating changes in life expectancy in Hong Kong during the COVID-19**  
3 **pandemic**

4

5 Alexandra H. T. Law<sup>1</sup>, Anne M. Presanis<sup>2</sup>, Justin K. Cheung<sup>1</sup>, Peng Wu<sup>1</sup>, C. Mary  
6 Schooling<sup>3</sup>, Benjamin J. Cowling<sup>1,4†</sup>, Jessica Y. Wong<sup>1†</sup>

7

8 † Joint senior authors

9

10 **Affiliations:**

11 1. World Health Organization Collaborating Centre for Infectious Disease

12 Epidemiology and Control, School of Public Health, The University of Hong

13 Kong, Pokfulam, Hong Kong Special Administrative Region, China.

14 2. MRC Biostatistics Unit, University of Cambridge, Cambridge, United Kingdom.

15 3. School of Public Health, The University of Hong Kong, Pokfulam, Hong Kong

16 Special Administrative Region, China.

17 4. Laboratory of Data Discovery for Health Limited, Hong Kong Science and

18 Technology Park, New Territories, Hong Kong Special Administrative Region,

19 China.

20

21 **Corresponding author:**

22 Benjamin J. Cowling, School of Public Health, Li Ka Shing Faculty of Medicine, The

23 University of Hong Kong, 7 Sassoon Road, Pokfulam, Hong Kong.

24 Tel: +852 3917 6711; Fax: +852 3520 1945; email: [bcowling@hku.hk](mailto:bcowling@hku.hk)

25

26 Running head: Life expectancy in Hong Kong

27 Word count (abstract): 249

28 Word count (main text): 2,232

29

30 **ABSTRACT**

31 **Background:** Hong Kong has one of the longest life expectancies in the world but  
32 was heavily impacted by COVID-19 in 2022.

33 **Methods:** We constructed sex-specific life tables from 1998-2023 using parametric  
34 bootstrapping to account for statistical uncertainty in mortality rates. We used  
35 Arriaga's decomposition method to estimate age-specific contributions to overall  
36 changes in life expectancy over this period. We also estimated cause-specific  
37 mortality rates.

38 **Results:** Hong Kong reported 50666 deaths in 2020, 51354 in 2021, 63692 in 2022,  
39 and 54731 in 2023. Estimates of life expectancy in males and females in 2020 and  
40 2021 were similar to the pre-pandemic trend from 1998-2019 but declined  
41 significantly in 2022. Life expectancy for males was 82.3 years in 2021 and 80.4  
42 years in 2022, and for females it was 87.9 in 2021 and 86.4 years in 2022. Compared  
43 to the pre-pandemic trend, the 2022 values corresponded to reductions by 2.22 (95%  
44 CI: 2.08, 2.36) years in males and 2.30 (95% CI: 2.17, 2.43) years in females. The  
45 loss in life expectancy in 2022 was mainly attributed to increased respiratory  
46 mortality rates in adults aged 65 or above. In 2023 life expectancy increased by 0.60  
47 (95% CI: 0.46, 0.75) years in males and by 1.10 (95% CI: 0.95, 1.26) years in  
48 females.

49 **Conclusions:** In 2022 a very high respiratory mortality rate in older adults in Hong  
50 Kong during the COVID-19 pandemic was associated with a reduction in life  
51 expectancy by more than 2 years. In 2023 life expectancy increased towards the  
52 pre-pandemic trend.

53

54 Keywords: COVID-19, life expectancy, life table, cause of death, uncertainty,

55 parametric bootstrap

## 56 INTRODUCTION

57 Life expectancy from birth is a common measure used for international comparisons  
58 of population health <sup>1</sup>. With advancement in healthcare resulting from successful  
59 economic development, Hong Kong's life expectancy has risen significantly over the  
60 decades, making it one of the longest in the world <sup>2</sup>. A decrease in life expectancy was  
61 observed in several Asian countries with high life expectancies in 2022 after the  
62 spread of Omicron, including Japan <sup>3</sup> and South Korea <sup>4</sup>.

63

64 Hong Kong used public health and social measures to minimize COVID-19  
65 transmission for the first two years of the pandemic <sup>5</sup>, but experienced a major  
66 epidemic of Omicron BA.2 in early 2022 resulting in around half of the population  
67 being infected and more than 10,000 confirmed COVID-19 deaths among Hong  
68 Kong's 7.3 million population <sup>6,7</sup>. The majority of the deaths were observed in older  
69 adults  $\geq 65$  years of age <sup>8</sup>. The reported number of COVID-19 deaths might not reveal  
70 the full picture of the impact of the pandemic because some confirmed deaths might  
71 have occurred with COVID-19 rather than because of COVID-19, while the control  
72 measures used to reduce transmission also had a substantial indirect impact which  
73 may have affected mortality <sup>9</sup>. The World Health Organization estimated that 14.83  
74 million excess deaths occurred in the first two years of the pandemic <sup>10</sup>. The Institute  
75 for Health Metrics and Evaluation estimated that global life expectancy decreased by  
76 1.6 years from 2019 to 2021 <sup>11</sup>, which was a dramatic reversal from the slowly  
77 increasing trend before 2019.

78

79 To explore how the COVID-19 pandemic affected mortality in Hong Kong, a city  
80 having a high proportion of older adults, in this study we estimated patterns in

81 mortality rates and the consequent life expectancy changes in Hong Kong during the  
82 COVID-19 pandemic.

83

## 84 **METHODS**

### 85 *Sources of data*

86 Age-specific weekly deaths from 1998 to 2023 were obtained from the Census and  
87 Statistics Department of the Government of the Hong Kong Special Administrative  
88 Region. For analysis of cause-specific death rates, we selected 9 major primary causes  
89 of death, including malignant neoplasms, cardiovascular, respiratory, kidney diseases,  
90 diabetes mellitus, chronic liver disease, dementia, septicemia, and external causes. A  
91 final category, “other causes”, included all other deaths. These ten cause of death  
92 groupings were coded according to the International Classification of Diseases, Ninth  
93 Revision (ICD-9) and Tenth Revision (ICD-10) (Appendix). Almost all deaths in  
94 Hong Kong occur in hospital, which facilitates accurate coding. The age-specific  
95 mid-year population sizes from 1998 to 2023 were obtained from the Census and  
96 Statistics Department and were used as the denominators for the estimation of  
97 mortality rates<sup>12</sup>. The population sizes for ages 85 to  $\geq 100$  years in 1996, 2001, 2006,  
98 2011, 2016, and 2021 were obtained from the censuses and by-censuses conducted by  
99 the Census and Statistics Department<sup>13</sup>. These data were used to estimate the  
100 population size from age 85 to  $\geq 100$  years from 1998 to 2023 (Appendix). Our study  
101 received ethical approval from the Institutional Review Board of the University of  
102 Hong Kong.

103

### 104 *Statistical analysis*

105 We constructed life tables for each year from 1998 to 2023 based on local mortality

106 rates by age and sex (Appendix). We used a parametric bootstrap approach assuming  
107 that age- and sex-specific mortality rates followed Poisson distributions, allowing us to  
108 construct uncertainty intervals for the estimated life expectancy. We used simple linear  
109 regression models to fit the change in life expectancy between 1998 and 2019 and  
110 extrapolated this linear fit to the pandemic years.

111

112 Arriaga's decomposition method was used to investigate the contribution of different  
113 age groups to changes in life expectancy in 2020, 2021, and 2022<sup>14</sup>. The age-specific  
114 contribution consists of both direct and indirect effects taking the preceding year as a  
115 reference. However, the last age group only gives a direct contribution, as there is no  
116 older age constituting an indirect effect. The sum of effects from all ages and the total  
117 change in life expectancy in years should be equal. The change in life expectancy by  
118 age was estimated for six age groups: 0-4, 5-14, 15-44, 45-64, 65-79, and  $\geq 80$  years.  
119 We did not conduct this decomposition analysis for 2023 versus 2022 because the very  
120 high mortality rates in 2022 would affect the comparison. All statistical analyses were  
121 conducted in R version 4.3.3 (R Foundation for Statistical Computing, Vienna,  
122 Austria).

123

## 124 **RESULTS**

125 Figure 1 shows the all-cause mortality rates from 1998 to 2023 for males and females  
126 in six age groups. From 1998 through to 2021 the age-specific mortality rates  
127 generally declined over time for both males and females. The mortality rates increased  
128 substantially in 2022 in all age groups except in 5-14 years. In particular, the  
129 estimated mortality rates among males and females  $\geq 80$  years increased dramatically  
130 from 2021 to 2022. For males, mortality rates increased from 8120 per 100,000 in

131 2021 to 10800 per 100,000 in 2022, and for females it increased from 6590 per  
132 100,000 in 2021 to 8340 per 100,000 in 2022. The long-term decreases in mortality  
133 rates over the study period resulted in a steady increase in the life expectancy of both  
134 sexes, from 77.3 in 1998 to 82.3 in 2021 for males, and from 83.1 in 1998 to 87.9 in  
135 2021 for females in Figure 2. In 2022, life expectancy declined to 80.4 years in males  
136 and 86.4 years in females. Using linear regression models, we projected the trend in  
137 life expectancy from 1998 through 2019 into the three pandemic years, shown as  
138 dotted lines in Figure 2. Compared to those secular trends in males and females, life  
139 expectancy decreased slightly in 2020 and 2021 in females while it remained similar  
140 to the projected trend in males in those two years. Life expectancy then declined very  
141 substantially in 2022 by 2.22 (95% confidence interval, CI: 2.08, 2.36) years in males  
142 and by 2.30 (95% CI: 2.17, 2.43) years in females, compared to the extrapolated value  
143 from the slowly increasing trend from 1998-2019.

144

145 In 2023, life expectancy rose in males and females back towards the pre-pandemic  
146 trend, increasing by 0.60 (95% CI: 0.46, 0.75) years in males and by 1.10 (95% CI:  
147 0.95, 1.26) years in females. The life expectancy estimates of 82.2 (95% CI: 82.1,  
148 82.3 years in males and 87.8 (95% CI: 87.6, 87.9) years in females were still lower  
149 than the pre-pandemic trend which under our simple linear extrapolation would have  
150 corresponded to life expectancies of 82.8 years in males and 88.9 years in females in  
151 2023 (Figure 2).

152

153 In our decomposition analysis by age group, the statistically significant reduction in  
154 female life expectancy from 2021 to 2022 was largely attributed to the increase in  
155 mortality rate among females aged 80 years or above, followed by those aged 65-79



156 years (Figure 3). Similarly, the decrease in male life expectancy from 2021 to 2022  
157 was also attributed to increased mortality rates in males aged  $\geq 80$  years, followed by  
158 those 65-79 years.

159

160 Figure 4 shows the mortality rates by cause and by sex from 1998-2023. The largest  
161 increase in 2022 was observed in mortality from respiratory causes, and smaller  
162 increases in mortality rates were observed in 2022 in several other cause of death  
163 categories, except cancer for males, in 2022. From 1998-2023, most of the  
164 cause-specific mortality rate of males were higher than that of females, apart from  
165 diabetes, kidney diseases, and septicemia. In 2023, cause-specific mortality rates  
166 returned to levels that were comparable to those prior to the COVID-19 pandemic for  
167 some causes although respiratory and cardiovascular mortality remained elevated.

168

## 169 **DISCUSSION**

170 COVID-19 was successfully contained in Hong Kong in 2020 and 2021, with fewer  
171 than 1% of the population infected <sup>15</sup>, but the uncontrolled spread of Omicron BA.2 in  
172 early 2022 had a very substantial impact <sup>6,7</sup>. The loss in life expectancy in 2022  
173 compared to an extrapolated prediction based on the pre-pandemic trend, by 2.22  
174 years in males and by 2.30 years in females, was mainly attributed to a large increase  
175 in mortality rates in persons aged  $\geq 65$  years (Figure 3). In cause-specific analysis we  
176 identified increases in mortality from respiratory causes and cardiovascular causes  
177 (Figure 4). There was no evidence of substantial displacement of mortality from other  
178 causes. In 2023, life expectancy in Hong Kong increased towards the pre-pandemic  
179 trend (Figure 2), but mortality rates remained elevated for respiratory diseases and

180 cardiovascular diseases (Figure 4) and male and female life expectancy remained  
181 somewhat below the extrapolated pre-pandemic trend.  
182  
183 The high mortality impact of SARS-CoV-2 Omicron BA.2 in Hong Kong in early  
184 2022 has been discussed at length elsewhere, and can be attributed to lower  
185 COVID-19 vaccine coverage in older adults and strain on healthcare resources <sup>6,16,17</sup>.  
186 By early 2022 the vaccination rate among individuals aged 80 years or above was the  
187 lowest among all adult age groups in Hong Kong, with 20.5% of males and 17.1% of  
188 females in this age group receiving at least two doses of SARS-CoV-2 vaccination at  
189 the beginning of 2022, compared to over 80% for adults  $\geq 18$  years overall <sup>5,18,19</sup>.  
190 SARS-CoV-2 Omicron BA.2 infections spread explosively in early 2022, causing  
191 severe strain on healthcare resources leading to a three-fold increase in case fatality  
192 rates at the peak of the epidemic in March compared to earlier or later in that  
193 epidemic <sup>16</sup>. The loss of slightly more than two years of life expectancy in both males  
194 and females during the COVID-19 pandemic in Hong Kong implies there were a  
195 substantial number of years of life lost.  
196  
197 Life expectancy is calculated from a life table where the observed age-specific  
198 mortality rates are applied to a standard population of one million births, as if the  
199 age-specific mortality rates would apply to that cohort as they progress through life.  
200 This allows a somewhat standardized comparison of age-specific mortality rates  
201 among population with different age structures. In Hong Kong's ageing population  
202 the COVID-19 pandemic caused a very substantial number of deaths in older adults,  
203 and the COVID-19 mortality rate in Hong Kong in 2022 was one of the highest per

204 capita rates in the world. Estimating the change in life expectancy enables a form of  
205 age-adjusted comparison with mortality rates in other locations.  
206  
207 Prior to the COVID-19 pandemic, global life expectancy increased from 62 years in  
208 1980 to 72 years in 2015 <sup>11</sup>. Hong Kong has also experienced steady increases in life  
209 expectancy over the last 25 years, but the COVID-19 pandemic had a drastic impact  
210 on life expectancy in 2022 (Figure 2). COVID-19 likely impacted life expectancy in  
211 almost every country, for example the life expectancy of males (females) in the  
212 United States decreased significantly by 2.1 (1.5) years in 2020, by a further 0.7 (0.6)  
213 years in 2021, and then increased by 1.3 (0.9) years in 2022 to a level still 1.5 (1.2)  
214 years below that in 2019 <sup>20</sup>. The United Kingdom reported reductions of life  
215 expectancy by 0.1-0.3 years each consecutive year in 2020, 2021 and 2022 <sup>21</sup>.  
216 Locations with high COVID-19 mortality rates in 2020 and 2021 would tend to have  
217 reductions in estimated life expectancy in those years. In contrast, Hong Kong along  
218 with several other locations in the Asia-Pacific region was able to minimize  
219 COVID-19 mortality until 2022 <sup>5</sup> and did not have substantial changes in life  
220 expectancy until 2022. Similar to Hong Kong, South Korea had slight increases in life  
221 expectancy in 2020 and 2021 but then had a reduction in life expectancy by 0.7 years  
222 in males and 1.0 years in females in 2022 <sup>22</sup>. Singapore reported almost no change in  
223 life expectancy in 2020, reductions by 0.4 and 0.5 years in males and females in 2021,  
224 and by 0.3 and 0.1 years in 2022 respectively <sup>23</sup>. Australia and New Zealand reported  
225 almost no change in life expectancy over the period 2020-22 <sup>24,25</sup>.  
226  
227 There are several limitations to discuss. First, we were not able to obtain mid-year  
228 population size for ages 85 to  $\geq 100$  years, and we made reasonable assumptions about

229 the distribution of population in this range (Appendix). Second, Arriaga's  
230 decomposition method is a common approach to assess changes in life expectancy but  
231 it is limited to decomposing the discrete changes such as changes from one year to the  
232 next. In Arriaga's decomposition method, the timing of changes within the time  
233 intervals is not captured, and the effects are averaged over the discrete periods. Third,  
234 we were not able to separate the direct impact, referring to deaths from COVID-19,  
235 and indirect impact, referring to the consequences of intervention policies implemented  
236 during the pandemic for example delays in ambulances responding to heart attacks, or  
237 increases in underlying medical conditions due to social isolation, change of lifestyles  
238 and delay of healthcare seeking behaviors, etc. We previously reported an increase in  
239 cardiovascular mortality in 2020 likely attributable to changes in healthcare seeking  
240 behaviors<sup>9</sup>. In a future study it would be of interest to separate the direct and indirect  
241 effects of the pandemic by including more covariates, including the effectiveness of  
242 the intervention policies, the long-term health impacts resulting from SARS-CoV-2  
243 infections, and changes in access to and utilization of medical services.

244

245 In conclusion, we estimated a substantial decrease in life expectancy in males and  
246 females in 2022, associated with substantial increases in all-cause mortality rates  
247 particularly in males and females aged 80 years or above, followed by those aged 65  
248 to 79 years, when a substantial drop in life expectancy occurred compared to the  
249 gradually increasing trend in the pre-pandemic years. Life expectancy increased  
250 somewhat in 2023 although it did not return to the pre-pandemic trend.

251 **ACKNOWLEDGEMENTS**

252 The authors thank Julie Au for technical support.

253

254 **FUNDING**

255 This project was financially supported by the Health and Medical Research Fund from

256 the Health Bureau of the Government of the Hong Kong Special Administrative

257 Region (grant no: CID-HKU2-14), and by a grant from the Research Grants Council

258 of the Hong Kong Special Administrative Region, China (Project No. T11-705/21-N).

259

260 **POTENTIAL CONFLICTS OF INTEREST**

261 B.J.C. has consulted for AstraZeneca, Fosun Pharma, GlaxoSmithKline, Haleon,

262 Moderna, Novavax, Pfizer, Roche, and Sanofi Pasteur. All other authors report no

263 potential conflicts of interest.

264

265 **REFERENCES**

- 266 1. Scholey J, Aburto JM, Kashnitsky I, et al. Life expectancy changes since  
267 COVID-19. *Nat Hum Behav.* Dec 2022;6(12):1649-1659.  
268 doi:10.1038/s41562-022-01450-3
- 269 2. Ni MY, Canudas-Romo V, Shi J, et al. Understanding longevity in Hong Kong: a  
270 comparative study with long-living, high-income countries. *Lancet Public Health.*  
271 Dec 2021;6(12):e919-e931. doi:10.1016/S2468-2667(21)00208-5
- 272 3. Munira MS, Okada Y, Nishiura H. Life-expectancy changes during the  
273 COVID-19 pandemic from 2019-2021: estimates from Japan, a country with low  
274 pandemic impact. *PeerJ.* 2023;11:e15784. doi:10.7717/peerj.15784
- 275 4. Statistics Korea. Life Tables for Korea 2022.  
276 [https://kostat.go.kr/board.es?mid=a20108060000&bid=11746&act=view&list\\_no=42](https://kostat.go.kr/board.es?mid=a20108060000&bid=11746&act=view&list_no=429104&tag=&nPage=1&ref_bid=)  
277 [9104&tag=&nPage=1&ref\\_bid=](https://kostat.go.kr/board.es?mid=a20108060000&bid=11746&act=view&list_no=429104&tag=&nPage=1&ref_bid=). Accessed 3 Oct 2024.
- 278 5. Yang B, Lin Y, Xiong W, et al. Comparison of control and transmission of  
279 COVID-19 across epidemic waves in Hong Kong: an observational study. *Lancet Reg*  
280 *Health West Pac.* Feb 2024;43:100969. doi:10.1016/j.lanwpc.2023.100969
- 281 6. Mefsin YM, Chen D, Bond HS, et al. Epidemiology of Infections with  
282 SARS-CoV-2 Omicron BA.2 Variant, Hong Kong, January-March 2022. *Emerg Infect*  
283 *Dis.* Sep 2022;28(9):1856-1858. doi:10.3201/eid2809.220613
- 284 7. Xin H, Law AHT, Cheung JK, et al. Comparison of excess deaths and  
285 laboratory-confirmed COVID-19 deaths during a large Omicron epidemic in 2022 in  
286 Hong Kong. *J Glob Health.* 2024;doi:10.1101/2024.07.04.24309940
- 287 8. Hospital Authority of the Government of the Hong Kong Special Administrative  
288 Region. Press Releases.  
289 [https://www.ha.org.hk/visitor/ha\\_visitor\\_index.asp?Content\\_ID=643&Lang=ENG&D](https://www.ha.org.hk/visitor/ha_visitor_index.asp?Content_ID=643&Lang=ENG&D)

- 290 [imension=100&Parent\\_ID=10000&Ver=HTML](#). Accessed 3 August 2024.
- 291 9. Xin H, Wu P, Wong JY, et al. Hospitalizations and mortality during the first year  
292 of the COVID-19 pandemic in Hong Kong, China: An observational study. *Lancet*  
293 *Reg Health West Pac*. Jan 2023;30:100645. doi:10.1016/j.lanwpc.2022.100645
- 294 10. Msemburi W, Karlinsky A, Knutson V, Aleshin-Guendel S, Chatterji S,  
295 Wakefield J. The WHO estimates of excess mortality associated with the COVID-19  
296 pandemic. *Nature*. Jan 2023;613(7942):130-137. doi:10.1038/s41586-022-05522-2
- 297 11. Collaborators GBDD. Global age-sex-specific mortality, life expectancy, and  
298 population estimates in 204 countries and territories and 811 subnational locations,  
299 1950-2021, and the impact of the COVID-19 pandemic: a comprehensive  
300 demographic analysis for the Global Burden of Disease Study 2021. *Lancet*. May 18  
301 2024;403(10440):1989-2056. doi:10.1016/S0140-6736(24)00476-8
- 302 12. Census and Statistics Department of the Government of the Hong Kong Special  
303 Administrative Region. Population Estimates.  
304 <https://www.censtatd.gov.hk/en/scode150.html>. Accessed 3 August 2024.
- 305 13. Census and Statistics Department of the Government of the Hong Kong Special  
306 Administrative Region. Census Results.  
307 [https://www.census2021.gov.hk/en/census\\_results.html](https://www.census2021.gov.hk/en/census_results.html). Accessed 3 August 2024.
- 308 14. Arriaga EE. Measuring and Explaining the Change in Life Expectancies.  
309 *Demography*. 1984;21(1):83-96. doi:10.2307/2061029
- 310 15. Boon SS, Wong MCS, Ng RWY, et al. Seroprevalence of Unidentified  
311 SARS-CoV-2 Infection in Hong Kong During 3 Pandemic Waves. *JAMA Netw Open*.  
312 Nov 1 2021;4(11):e2132923. doi:10.1001/jamanetworkopen.2021.32923
- 313 16. Wong JY, Cheung JK, Lin Y, et al. Intrinsic and Effective Severity of  
314 Coronavirus Disease 2019 Cases Infected With the Ancestral Strain and Omicron

- 315 BA.2 Variant in Hong Kong. *J Infect Dis*. Nov 2 2023;228(9):1231-1239.  
316 doi:10.1093/infdis/jiad236
- 317 17. Chong KC, Chan PK, Hung CT, et al. Changes in all-cause and cause-specific  
318 excess mortality before and after the Omicron outbreak of COVID-19 in Hong Kong.  
319 *J Glob Health*. Apr 28 2023;13:06017. doi:10.7189/jogh.13.06017
- 320 18. Wong IOL, Wong C, Mak N, et al. Assessment of the impact of the vaccine pass  
321 policy on COVID-19 vaccine hesitancy and uptake among Chinese adults in Hong  
322 Kong. *Vaccine*. May 22 2024;42(14):3346-3354. doi:10.1016/j.vaccine.2024.04.035
- 323 19. Xiao J, Cheung JK, Wu P, Ni MY, Cowling BJ, Liao Q. Temporal changes in  
324 factors associated with COVID-19 vaccine hesitancy and uptake among adults in  
325 Hong Kong: Serial cross-sectional surveys. *Lancet Reg Health West Pac*. Jun  
326 2022;23:100441. doi:10.1016/j.lanwpc.2022.100441
- 327 20. U.S. Centers for Disease Control and Prevention. Life Expectancy.  
328 <https://www.cdc.gov/nchs/fastats/life-expectancy.htm>. Accessed 3 Oct 2024.
- 329 21. Office for National Statistics of the United Kingdom. National life tables – life  
330 expectancy in the UK: 2020 to 2022.  
331 [https://www.ons.gov.uk/peoplepopulationandcommunity/birthsdeathsandmarriages/lif](https://www.ons.gov.uk/peoplepopulationandcommunity/birthsdeathsandmarriages/life-expectancies/bulletins/nationallifetablesunitedkingdom/2020to2022)  
332 [eexpectancies/bulletins/nationallifetablesunitedkingdom/2020to2022](https://www.ons.gov.uk/peoplepopulationandcommunity/birthsdeathsandmarriages/life-expectancies/bulletins/nationallifetablesunitedkingdom/2020to2022). Accessed 1 Oct  
333 2024.
- 334 22. Statistics Korea. Complete Life Tables.  
335 [https://kosis.kr/statHtml/statHtml.do?orgId=101&tblId=DT\\_1B42&vw\\_cd=MT\\_ETI](https://kosis.kr/statHtml/statHtml.do?orgId=101&tblId=DT_1B42&vw_cd=MT_ETI)  
336 [TLE&list\\_id=F\\_29&scrId=&language=en&seqNo=&lang\\_mode=en&obj\\_var\\_id=&it](https://kosis.kr/statHtml/statHtml.do?orgId=101&tblId=DT_1B42&vw_cd=MT_ETI)  
337 [m\\_id=&conn\\_path=MT\\_ETITITLE&path=%252Feng%252FstatisticsList%252Fstatisti](https://kosis.kr/statHtml/statHtml.do?orgId=101&tblId=DT_1B42&vw_cd=MT_ETI)  
338 [csListIndex.do](https://kosis.kr/statHtml/statHtml.do?orgId=101&tblId=DT_1B42&vw_cd=MT_ETI). Accessed 5 Oct 2024.
- 339 23. The Singapore Department of Statistics. Life Expectancy By Sex.



340 <https://tablebuilder.singstat.gov.sg/table/TS/M810501#!>. Accessed 1 Oct 2024.

341 24. Australian Bureau of Statistics. Life expectancy.

342 <https://www.abs.gov.au/statistics/people/population/life-expectancy/latest-release>.

343 Accessed 1 Oct 2024.

344 25. Statistics New Zealand. Life expectancy.

345 <https://www.stats.govt.nz/topics/life-expectancy/>. Accessed 13 Oct 2024.

346

347

348

349 **FIGURE LEGENDS**

350

351 Figure 1: All-cause mortality rates in Hong Kong by age and sex, from 1998-2023.

352

353 Figure 2: Life Expectancy for males and females in Hong Kong from 1998-2023 with

354 95% confidence intervals. The dashed lines show the fitted linear trends from

355 1998-2019 extrapolated to 2020-23.

356

357 Figure 3: Arriaga decomposition of age-specific contributions (with 95% confidence

358 intervals) to changes in life expectancy in 2019-2020 (light-shaded squares),

359 2020-2021 (diamonds), and 2021-2022 (dark-shaded squares) for males and females.

360 Each estimate shows the positive or negative change in life expectancy in the

361 corresponding age group between consecutive years.

362

363 Figure 4: Mortality rates in Hong Kong by cause and by sex from 1998-2023.

364

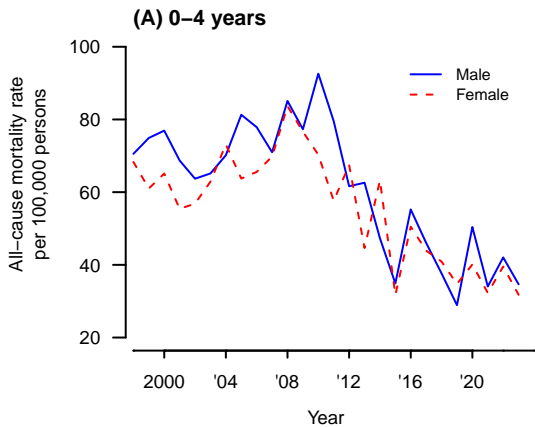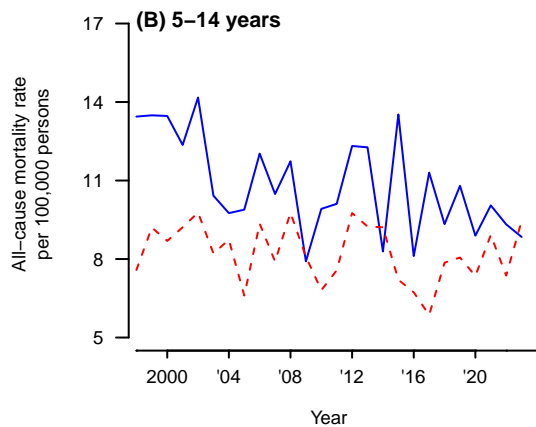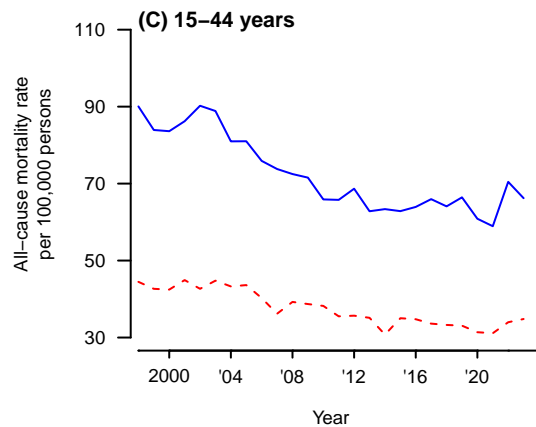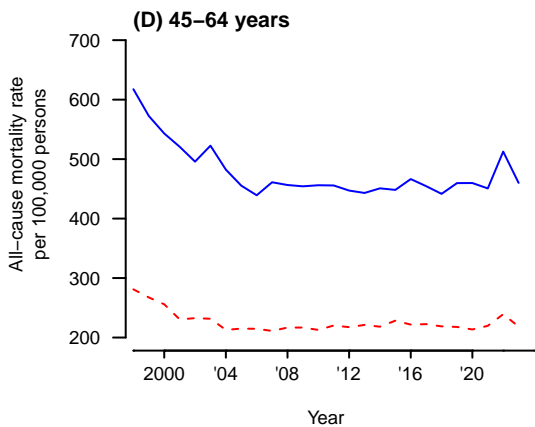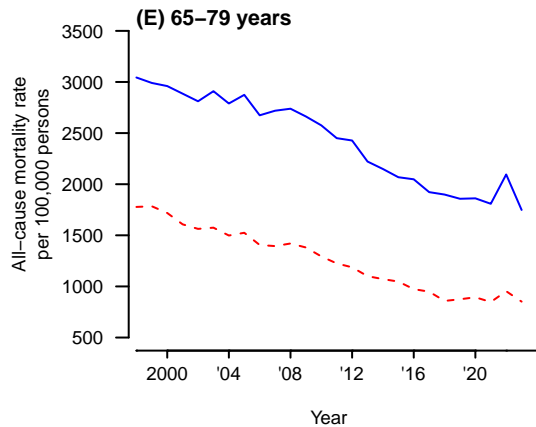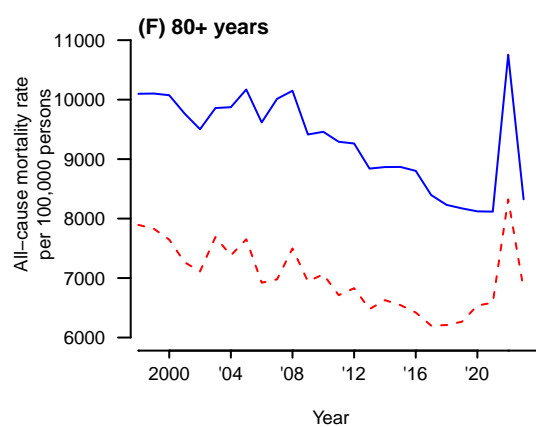

Life expectancy, years

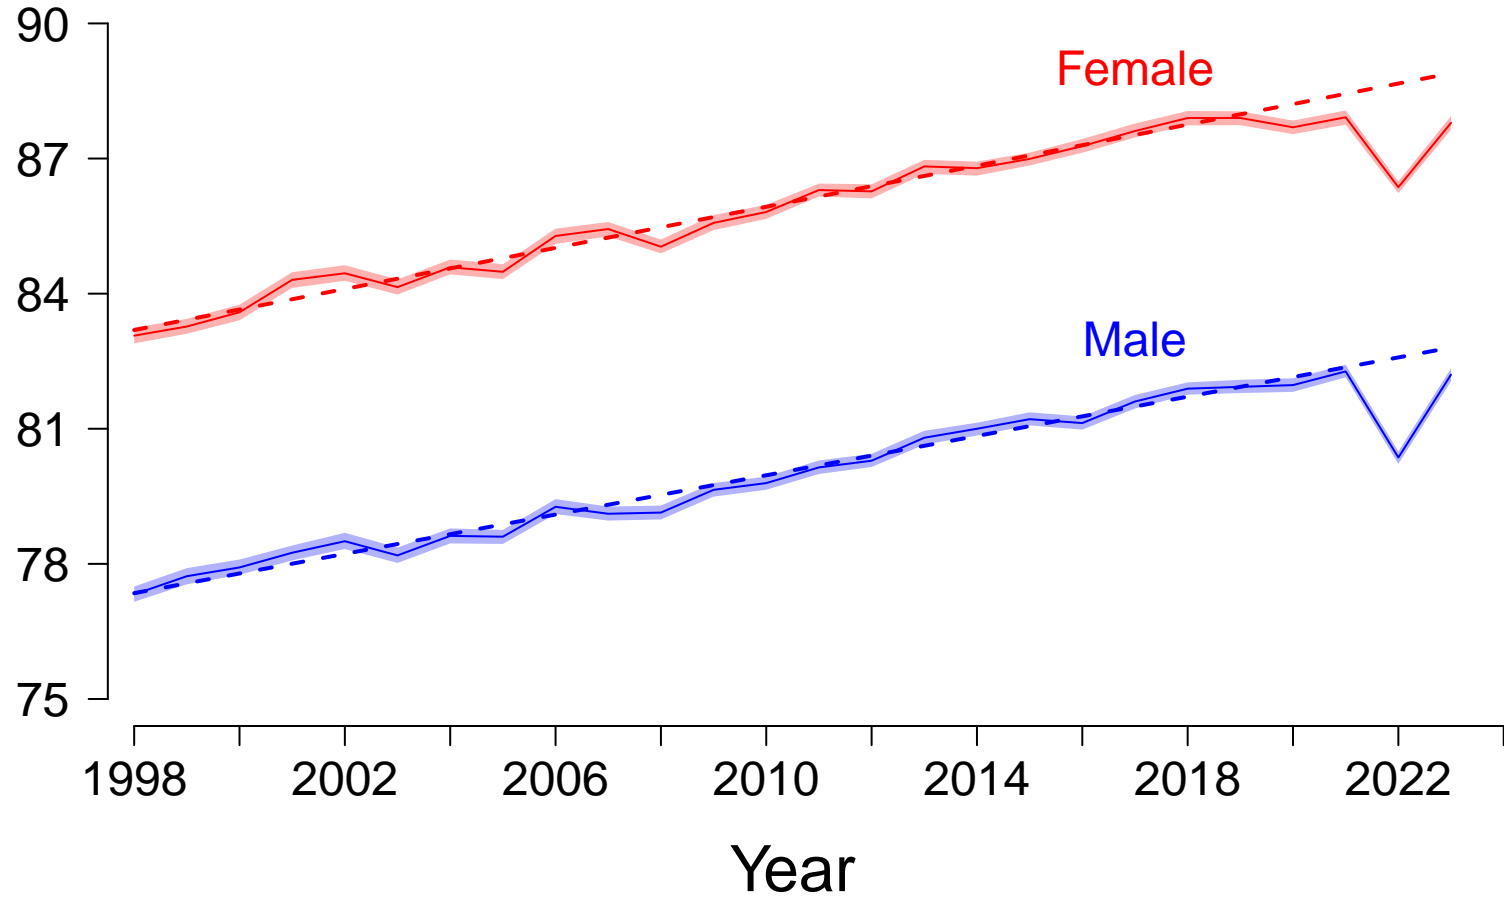

(A) Male

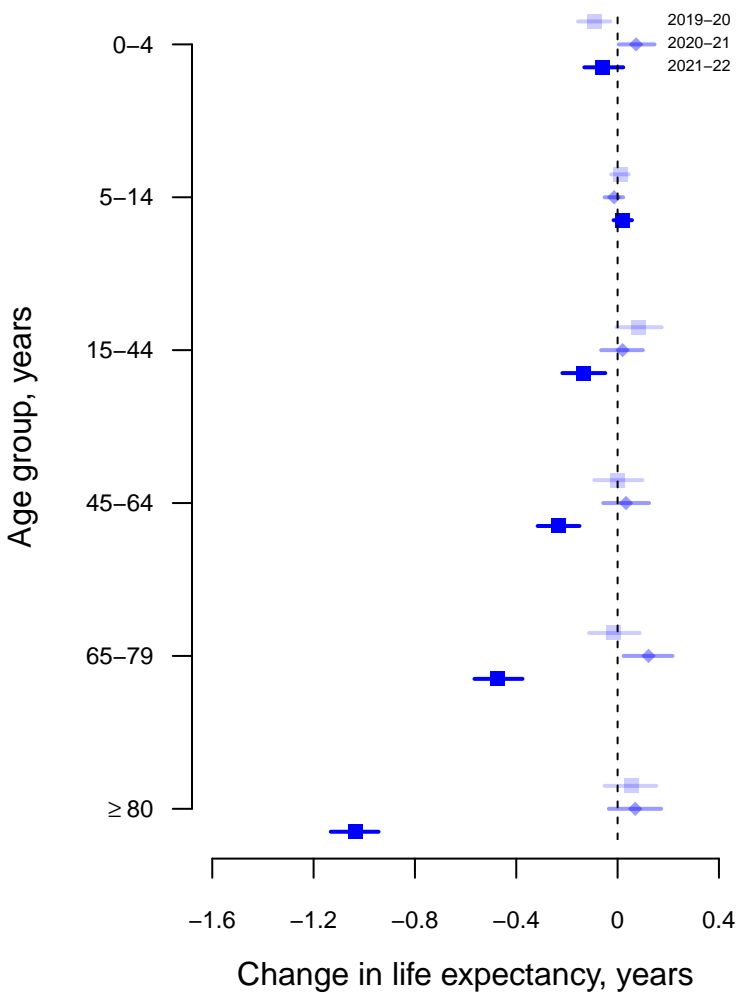

(B) Female

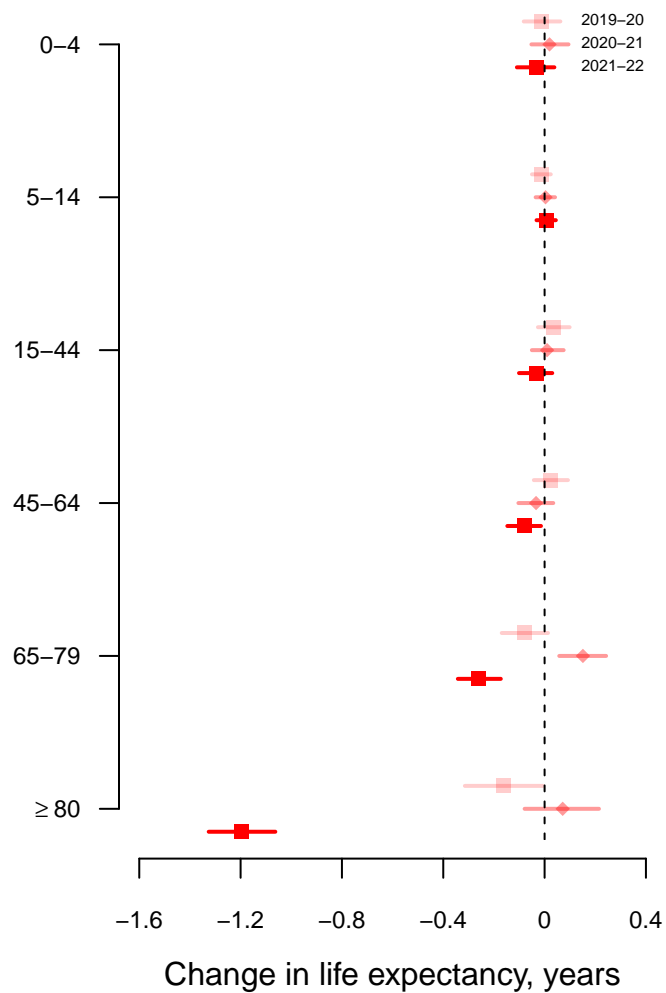

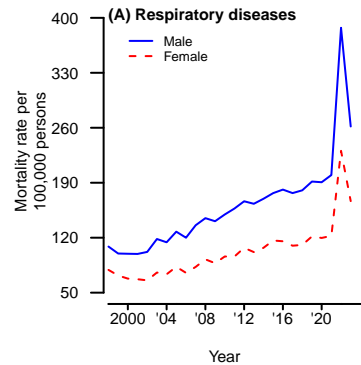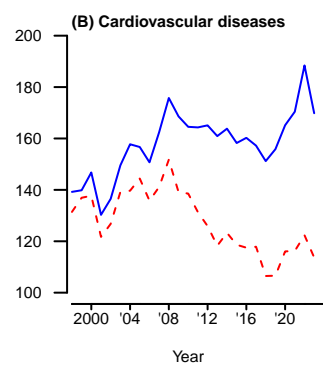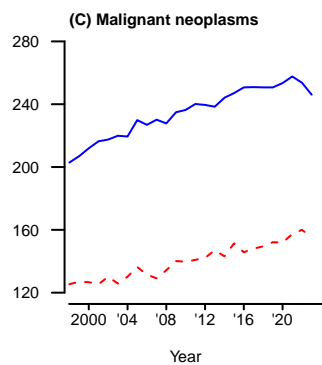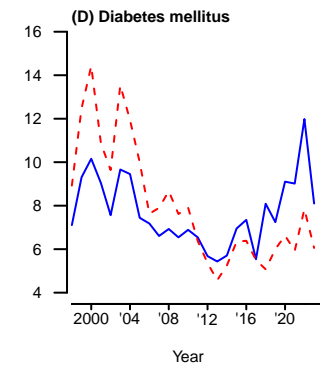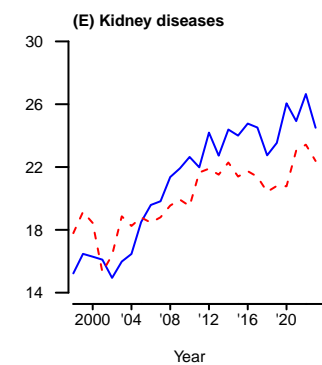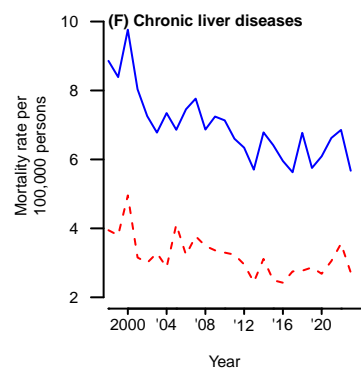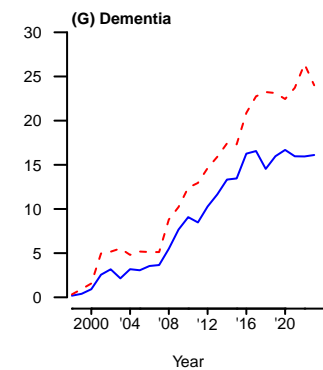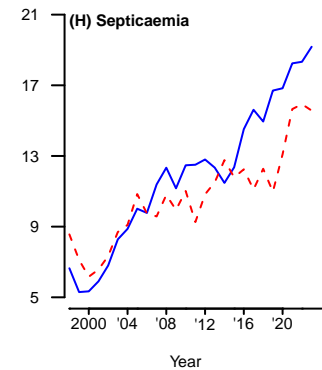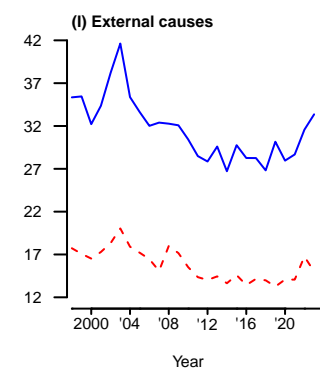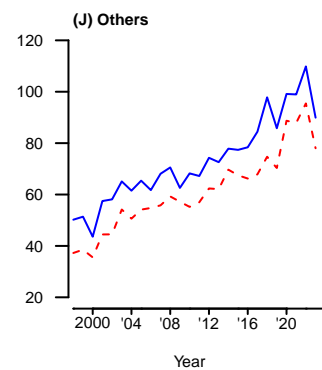

Source: https://medrxiv.org/content/medrxiv/early/2024/12/13/2024.12.12.24318910.full.pdf
